# Supplementary material
Source: PubMed Central journal article supplement (PMC6263851)
Supplement: NIHMS1511588-supplement-1.pdf [file NIHMS1511588-supplement-1.pdf]

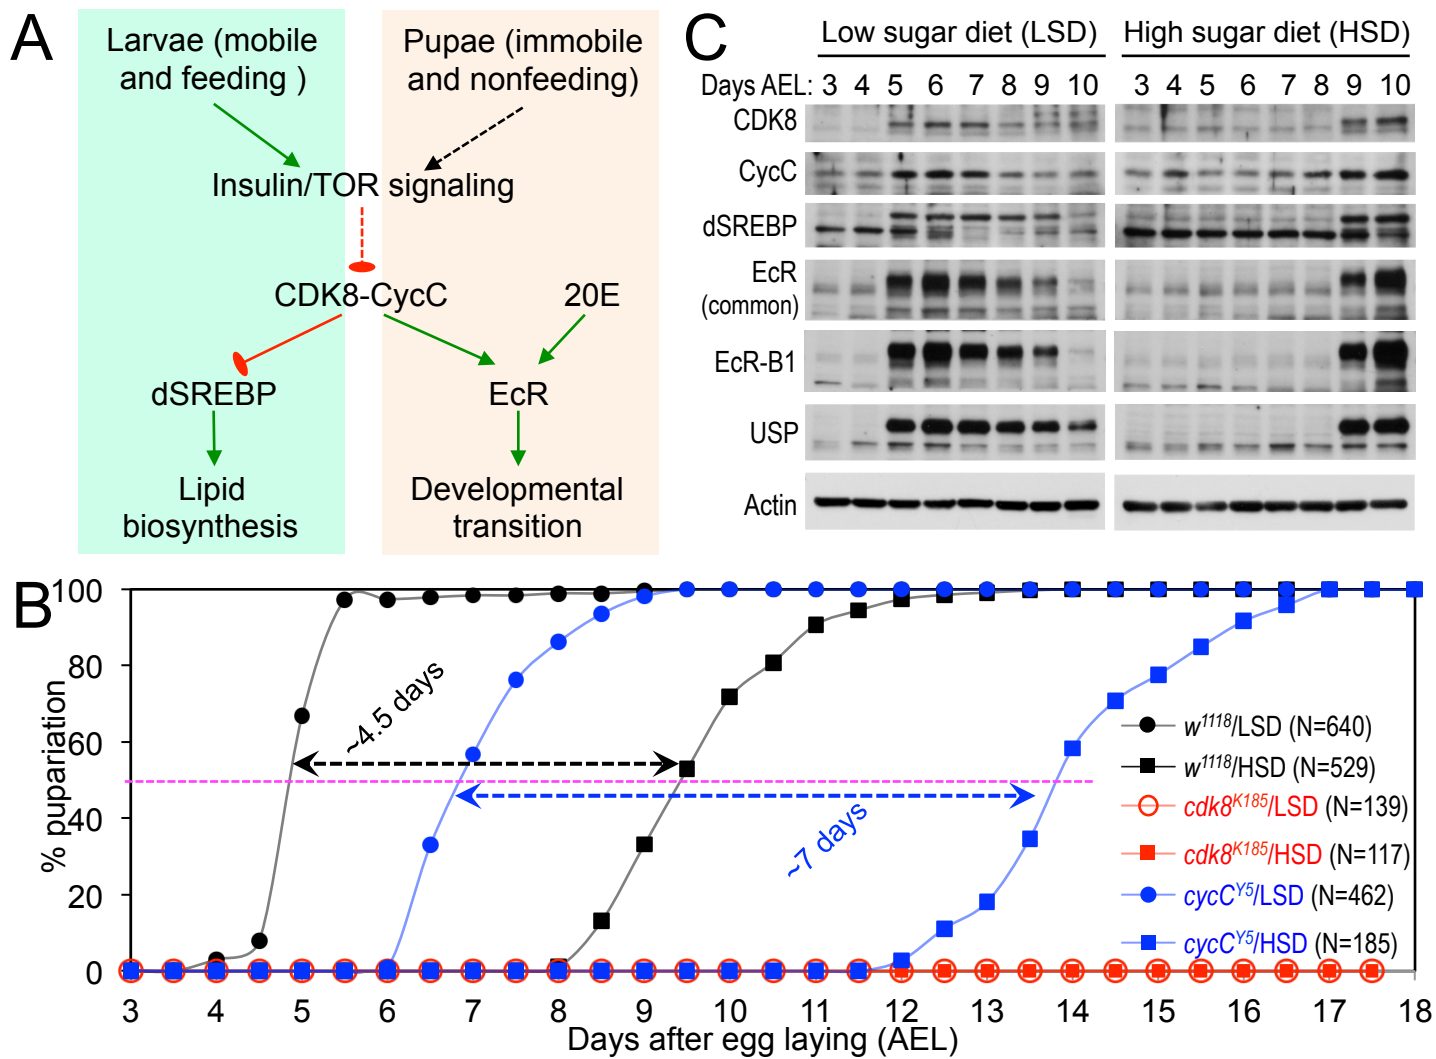

**Fig. 1**

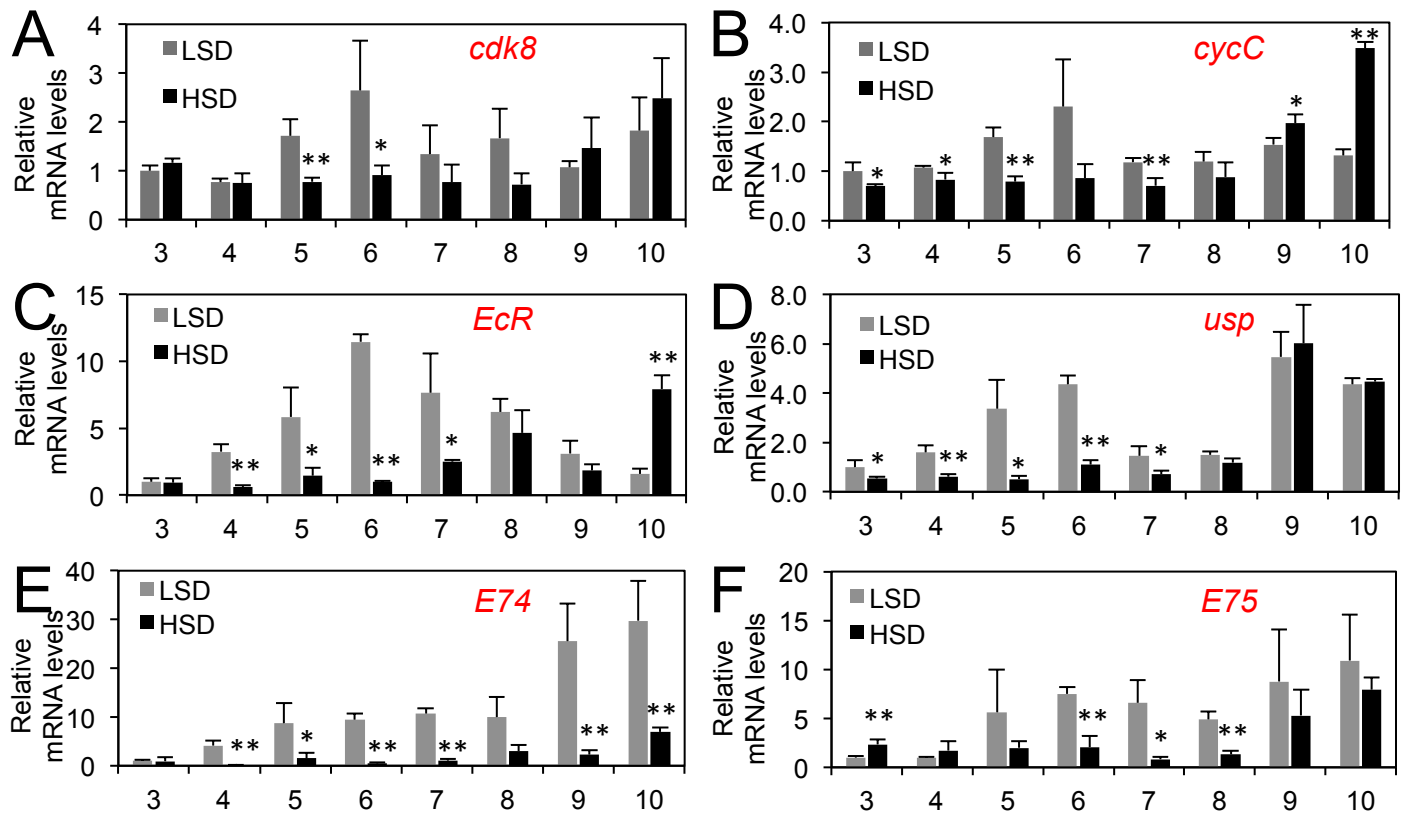

**Fig. 2**

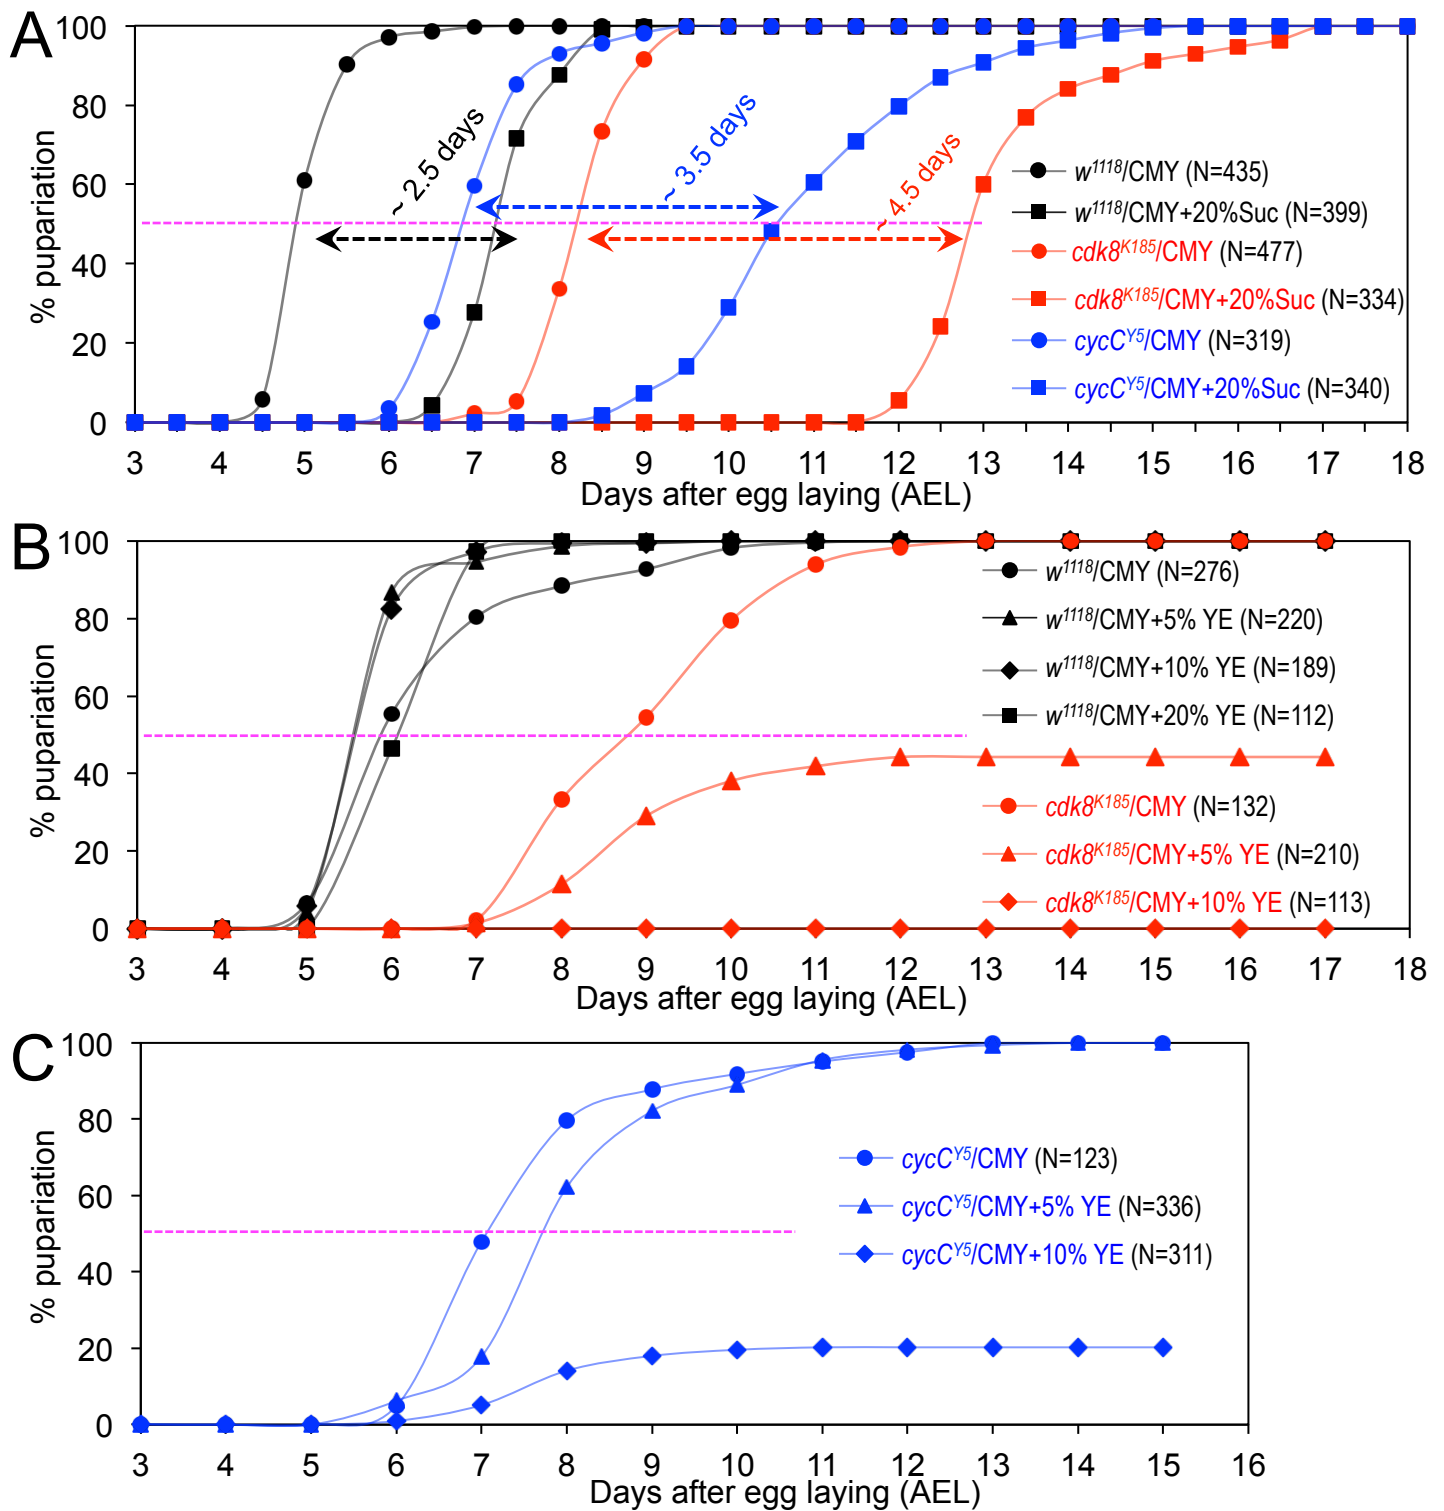

**Fig. 3**

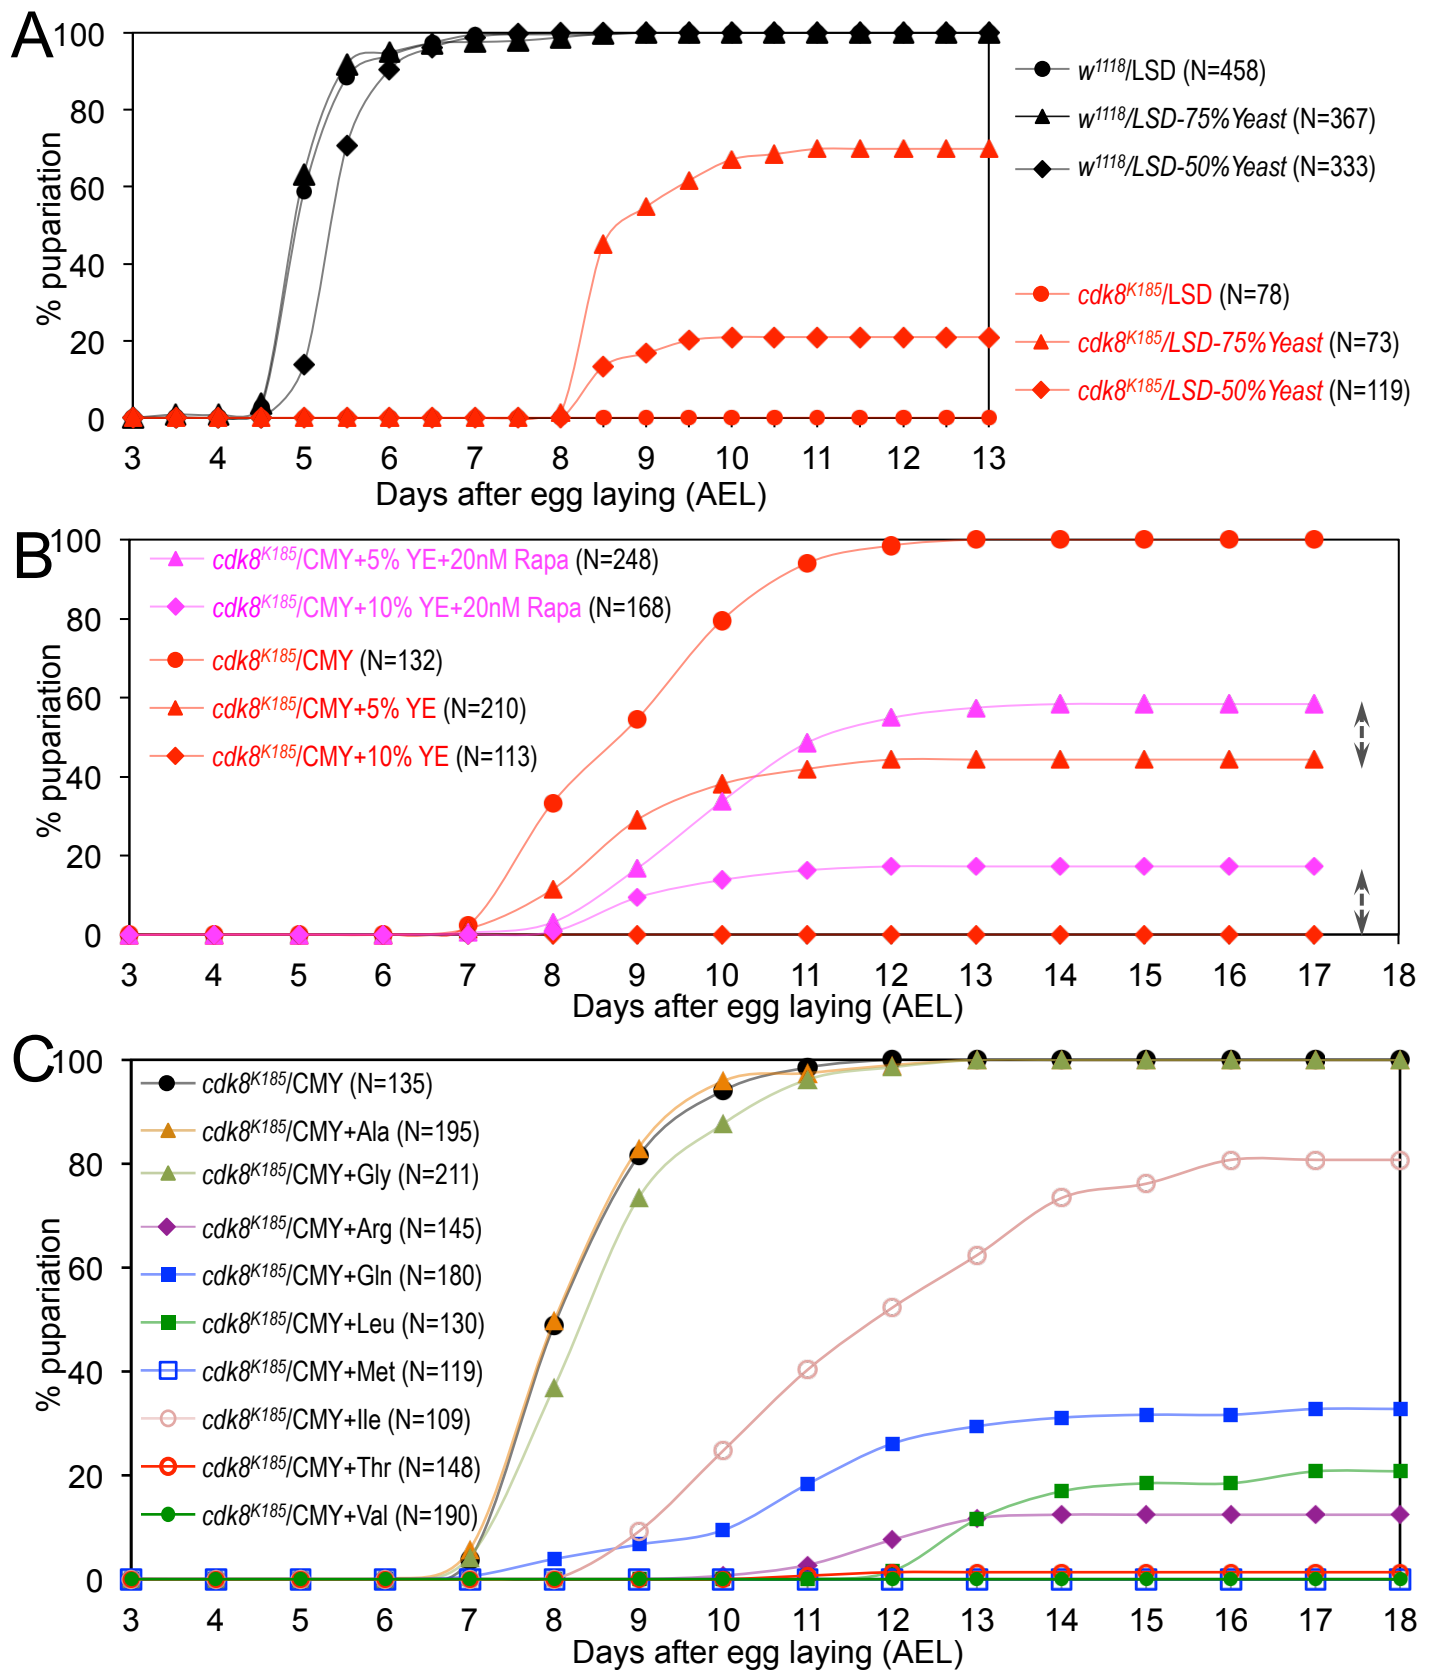

**Fig. 4**

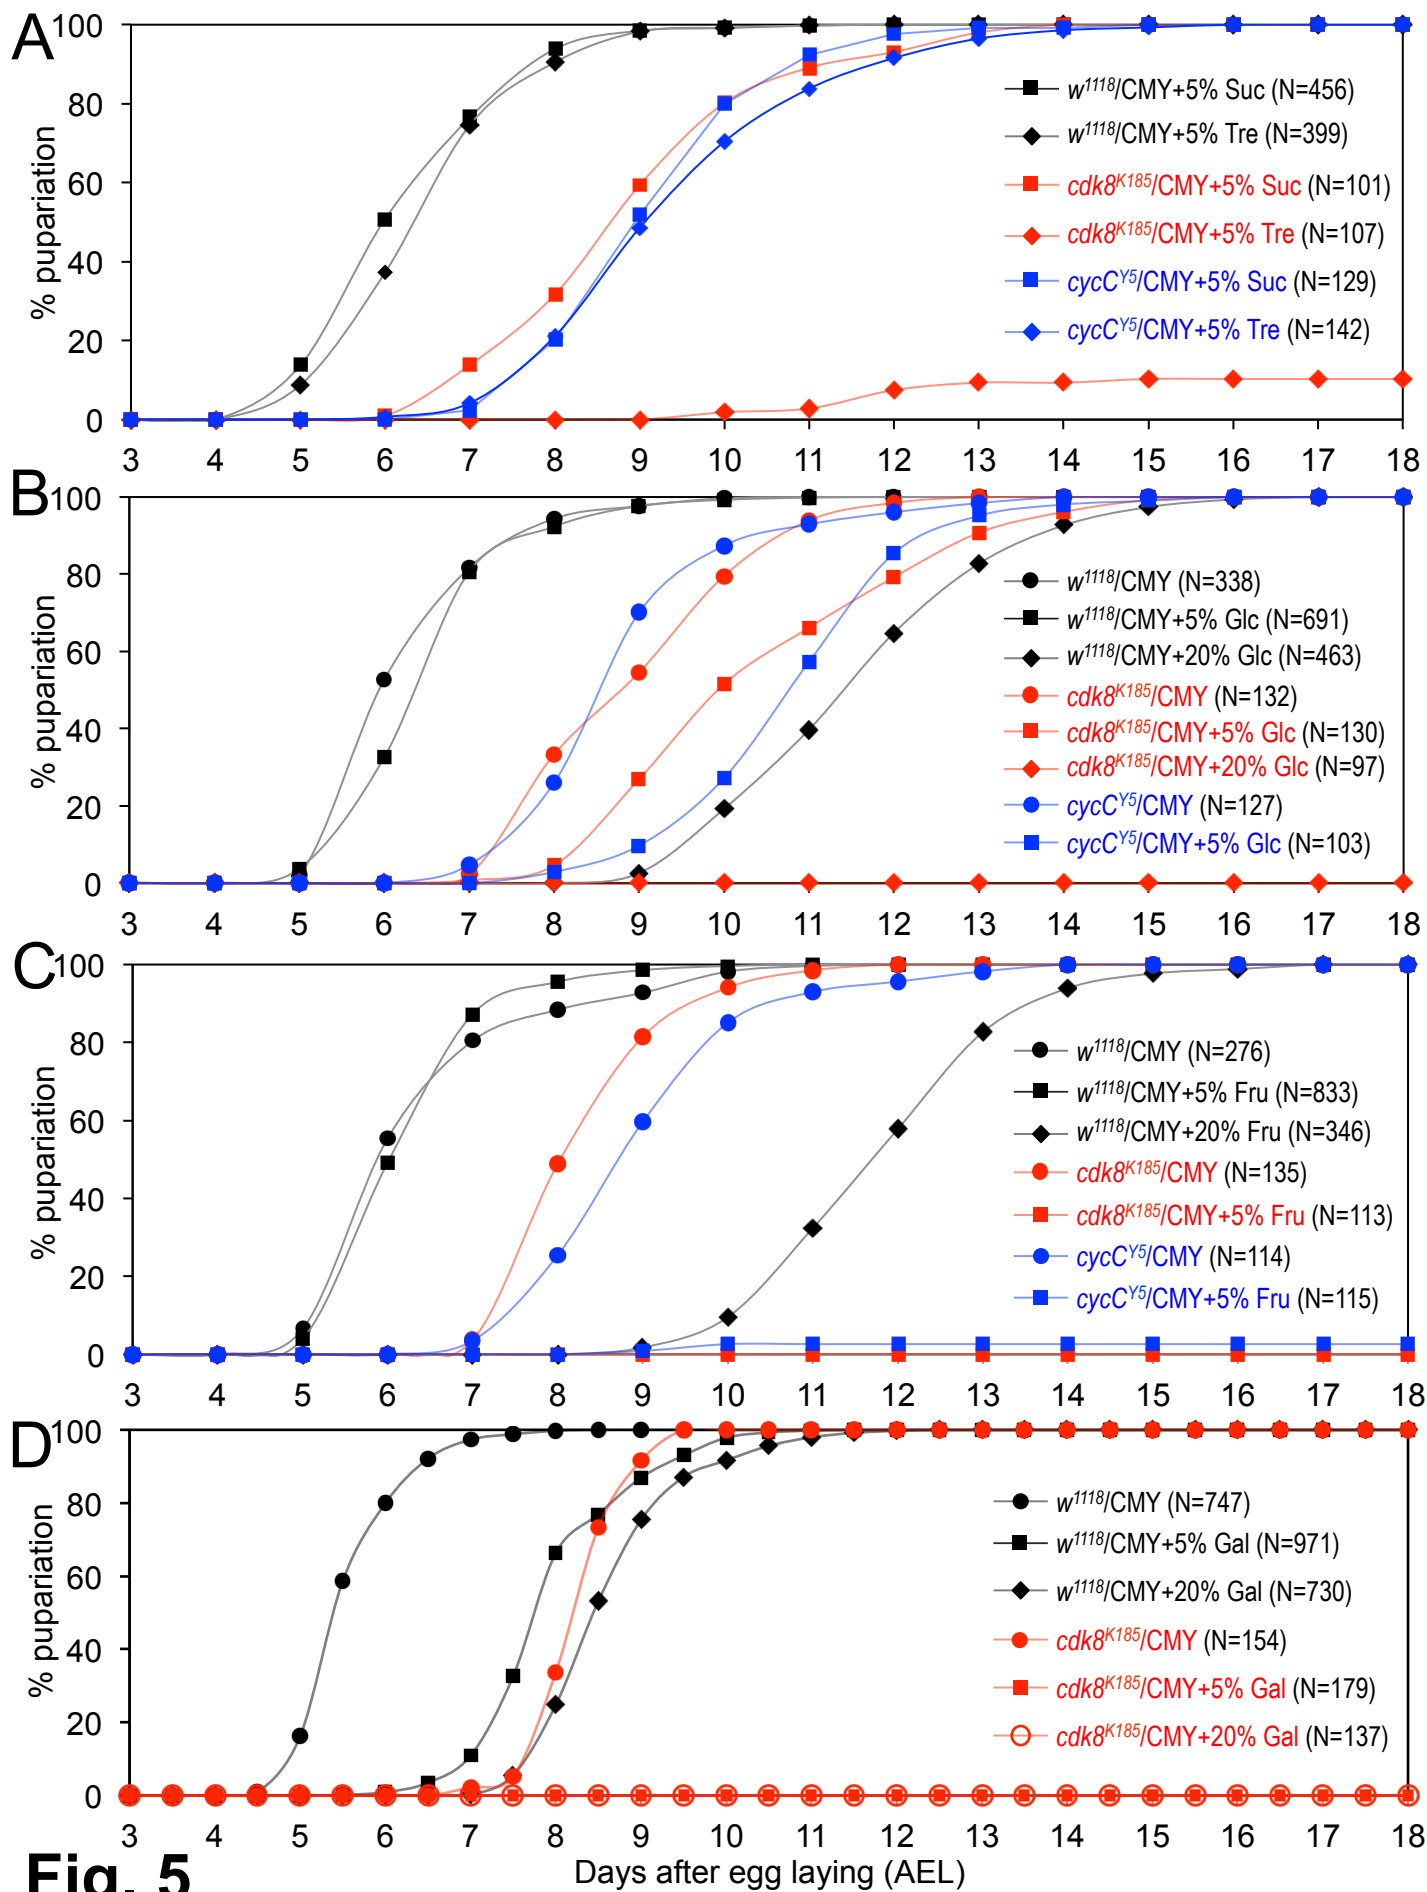

**Fig. 5**

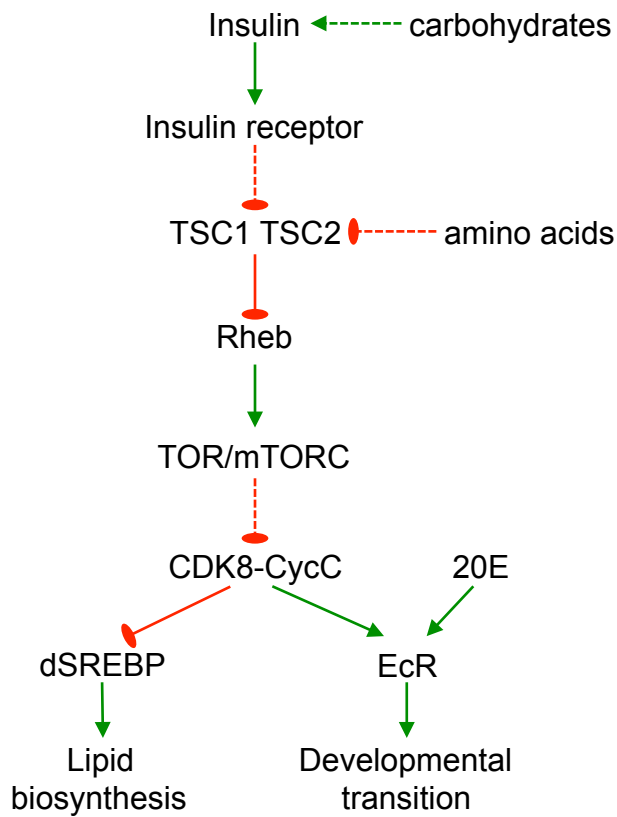

**Fig. 6**

**Table S1.** Recipes for preparation of different diets based on the LSD (“German food”) recipe.

|                    | <b>LSD*</b>  | <b>LSD-50%Yeast</b> | <b>LSD-75%Yeast</b> | <b>HSD</b>    |
|--------------------|--------------|---------------------|---------------------|---------------|
| Agar               | 5.0g         | 5.0g                | 5.0g                | 5.0g          |
| <b>Yeast</b>       | <b>40.0g</b> | <b>20g</b>          | <b>10.0g</b>        | <b>40.0g</b>  |
| Yeast extract      | 10.0g        | 10.0g               | 10.0g               | 10.0g         |
| Peptone            | 10.0g        | 10.0g               | 10.0g               | 10.0g         |
| MgSO4 (1M)         | 1.0ml        | 1.0ml               | 1.0ml               | 1.0ml         |
| CaCl2 (1M)         | 1.7ml        | 1.7ml               | 1.7ml               | 1.7ml         |
| propionic acid     | 3.0ml        | 3.0ml               | 3.0ml               | 3.0ml         |
| 10% mold inhibitor | 5.0ml        | 5.0ml               | 5.0ml               | 5.0ml         |
| <b>sucrose</b>     | <b>25.7g</b> | <b>25.7g</b>        | <b>25.7g</b>        | <b>171.0g</b> |

Add distilled water to above to make 500ml of media

\* LSD recipe is based on the detailed description by Na, J. et al. (2013) PLoS Genetics 9, e1003175.

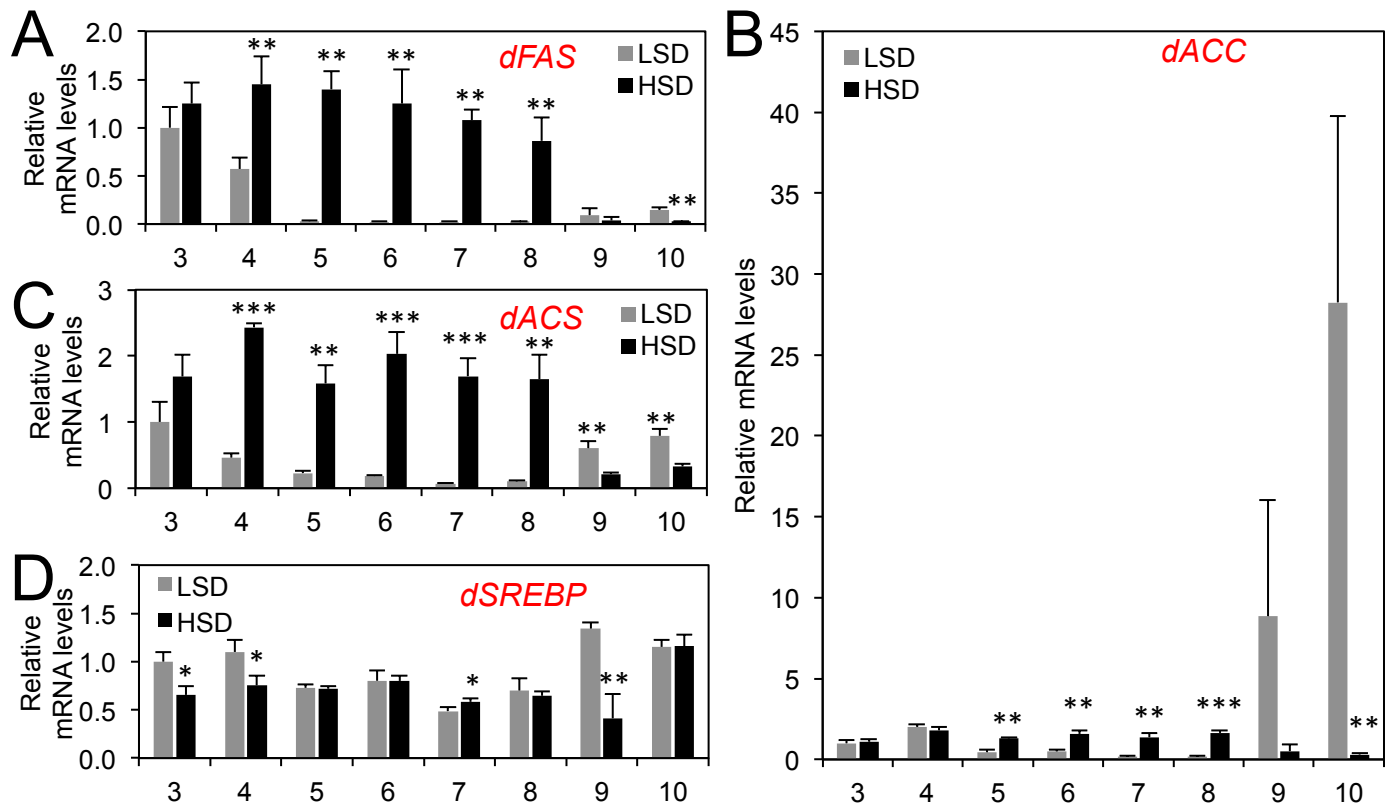

**Fig. S1**

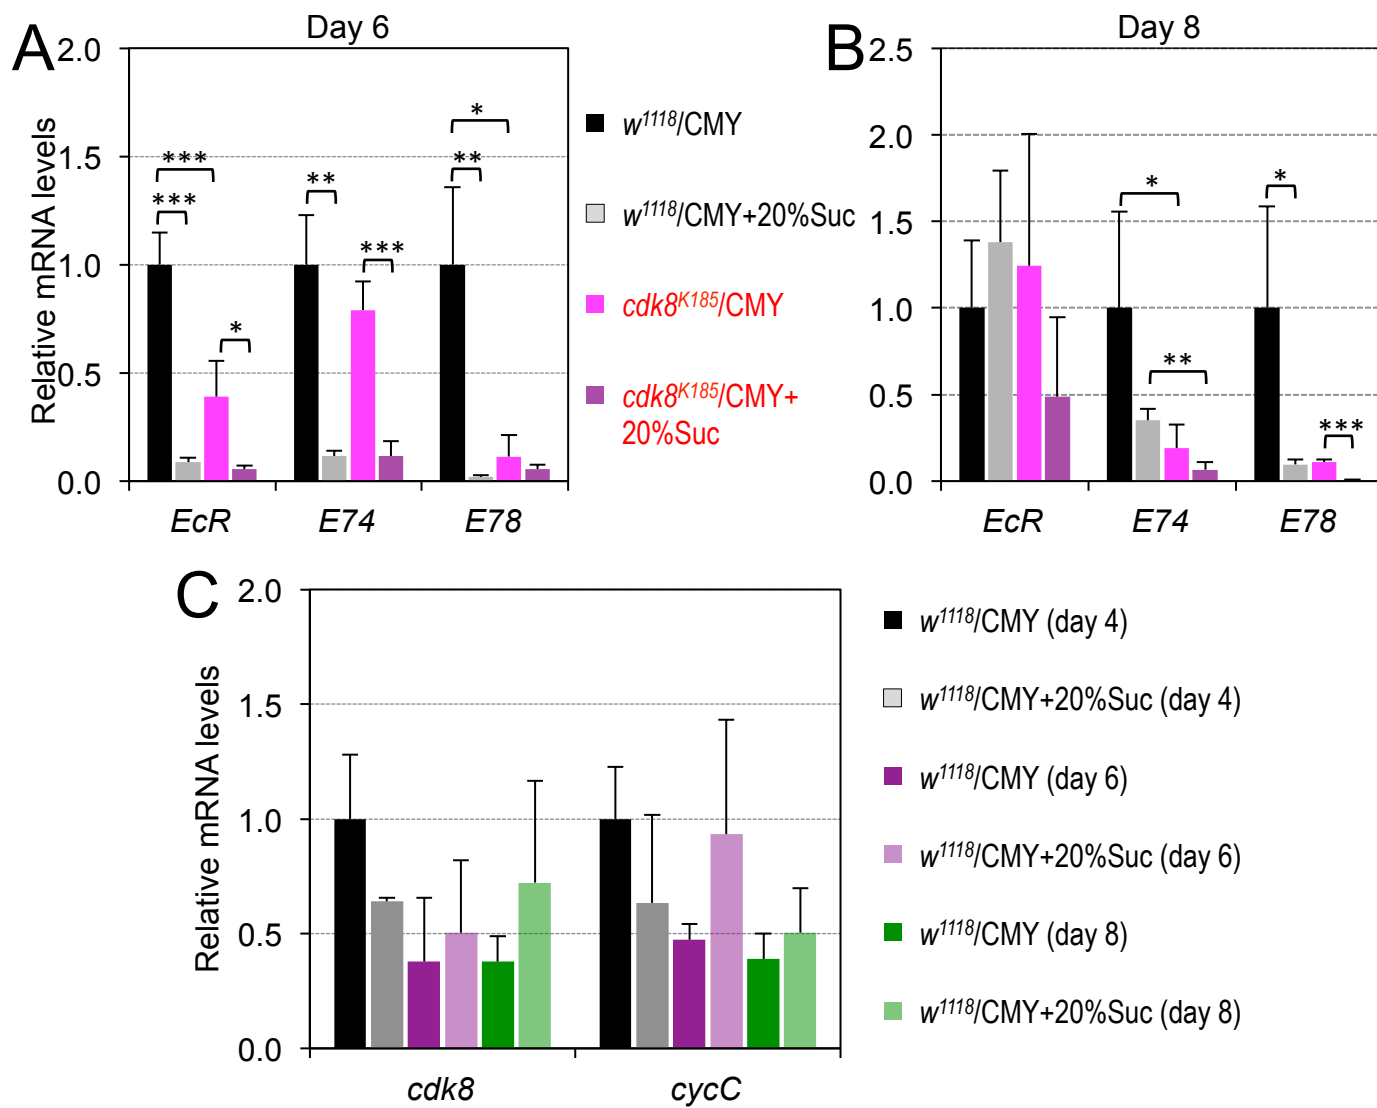

**Fig. S2**



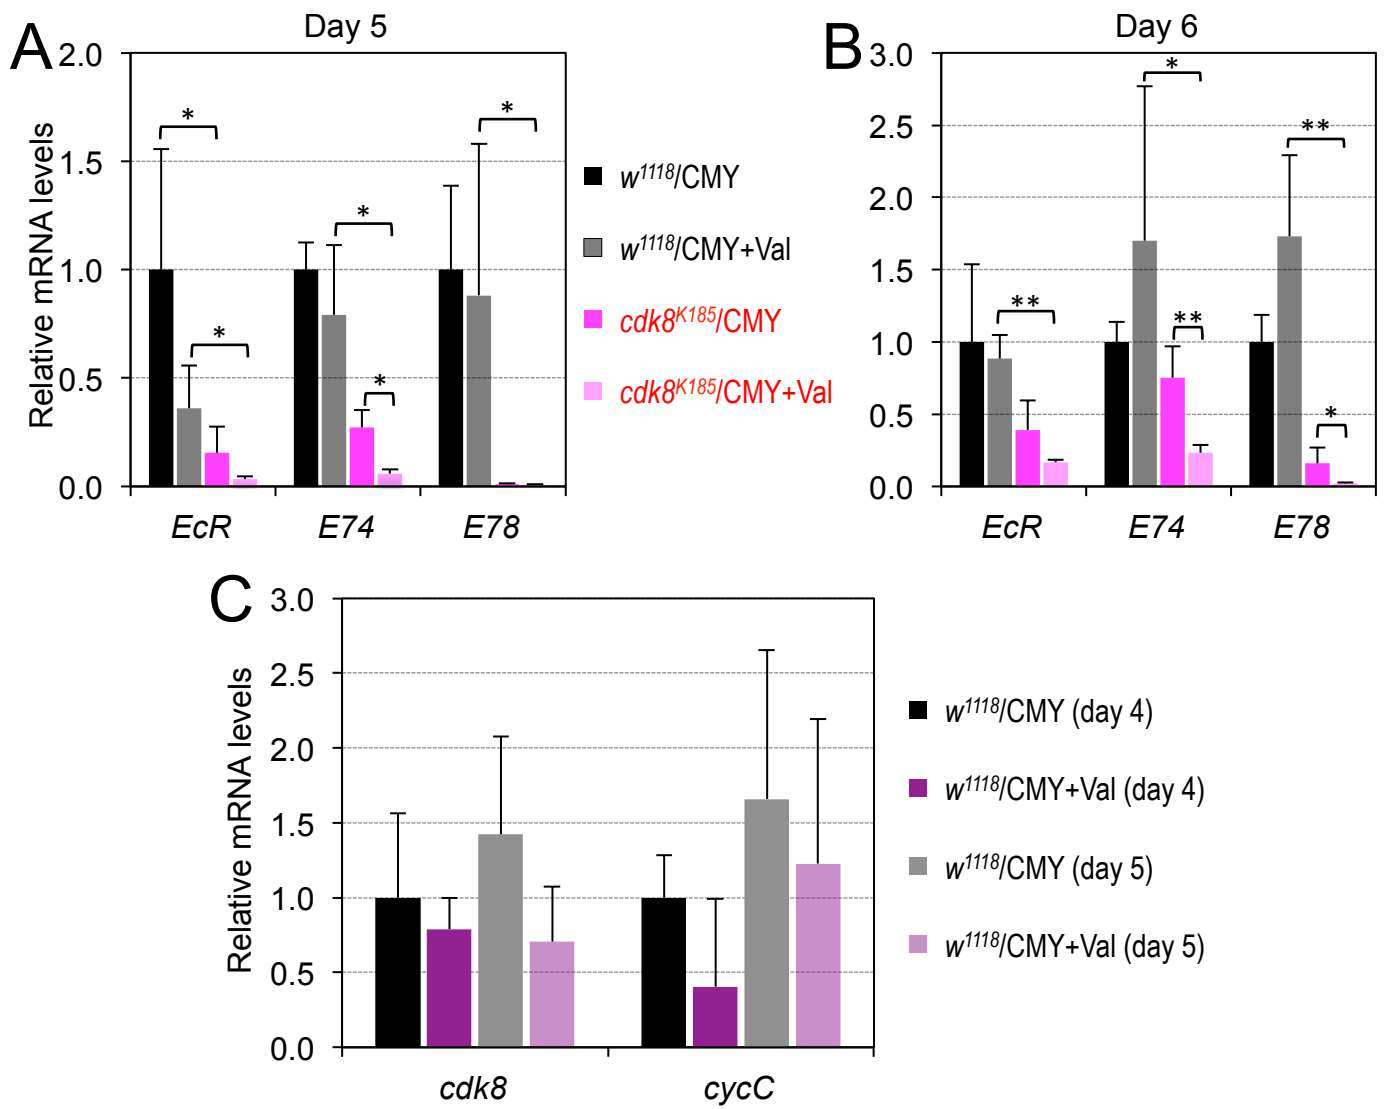

**Fig. S3**

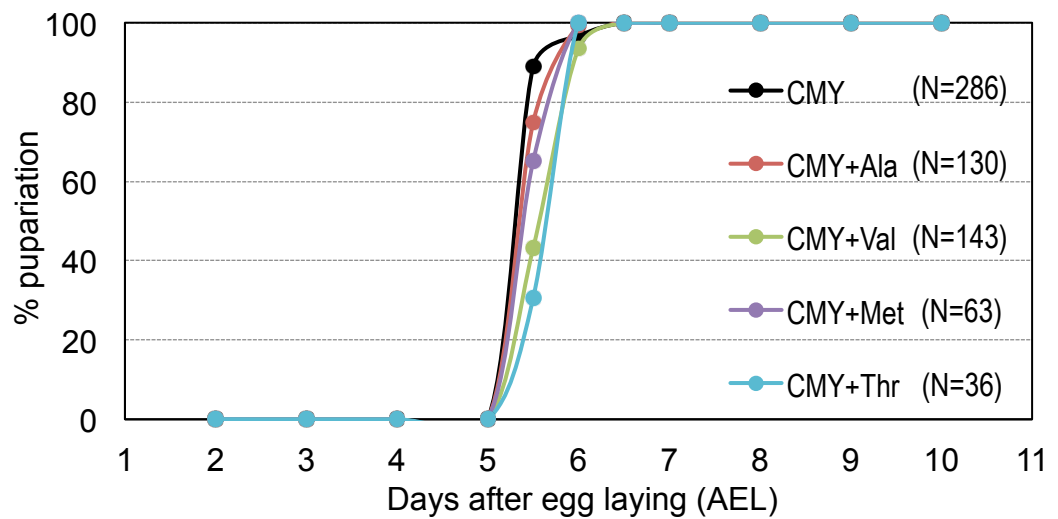

**Fig. S4**
